# Supplementary material
Source: publisher site journal article supplement (https://www.dovepress.com/article/376289)
Supplement: Supplementary file 1 [file get_supplementary_file.php]

| Musculoskeletal and Rheumatological disorders of COVID-19 infection | |
| --- | --- |
| Sociodemographic Characteristics | |
| Gender | Female  Male |
| Age (Years) |  |
| Marital status | Single/divorced/widowed  Married |
| Occupation | Employed  Not employed  Retired  Not able to work due to disability  Student |
| Residence | Urban  Rural |
| Education | None  Low School  Middle School  High School  College degree  Post-graduate |
| Smoking habit | Smoker  Former smoker  Never |
| You have active lifestyle | Yes  No |
| You have received courses of | Study Healthcare  Study Sciences  Neither Science nor Healthcare |
| Your family income | Not enough  Enough but no saving  Enough and saving |
| Your socioeconomic status | Low  Average  High |
| Clinical Data | |
| Weight (Kg) |  |
| Height (Cm) |  |
| Comorbidities | No  Diabetes  Hypertension  Coronary artery disease  Chronic renal disease  Chronic lung disease |
| COVID-19 infection | |
| Contacted to symptomatic case before COVID 19 infection | Yes  No |
| Have you experienced any of these manifestations during COVID-19 infection | No  Shortness of breath  Loss of taste  Cough  Loss of smell  Loss of appetite  Headache  Sore throat  Diarrhea  Dizziness  Fever  Diarrhea |
| How many days did your symptoms last, from the first day you became ill until symptoms resolved? |  |
| Severity of COVID-19 infection | Mild  Moderate  Severe |
| Pneumonia | No  Yes |
| O2 requirement | No  Yes |
| Investigations you have done to confirm the diagnosis of COVID-19 infection | Nothing  X-Ray chest  High resolution computerized Tomography  PCR-COVID-19  Antibodies for COVID-19  Complete blood count |
| Hospital admission |  |
| ICU admission |  |
| Outcome of COVID-19 infection in the first 2 weeks | Improvement  Deterioration |
| Musculoskeletal manifestations at the time or post COVID-19 infection | |
| Onset of musculoskeletal manifestations from the first day of COVID-19 infection (days ) |  |
| Have you any of these manifestations at the onset of post COVID-19 infection | No  Myalgia  Arthralgia  Muscle weakness  Facial muscle pain  Swollen joints  Widespread musculoskeletal pain  Infectious arthritis  Persistent dryness of the mouth  Persistent dryness of the eyes  Skin rash |
| Arthralgia | None  Mild  Moderate  Severe  Very severe |
| Myalgia | None   Mild   Moderate   Severe  Very severe |
| Fatigue | None   Mild   Moderate   Severe  Very severe |
| Have you at any time during COVID-19 or post COVID-19 infection had trouble (ache, pain, discomfort, numbness) in: | No  Neck  Right Shoulder  Left Shoulder  Right Elbow  Left Elbow  Right wrist/hand  Left wrist/hand  Upper Back  Lower Back  Ribs  Right Hip/Thigh  Left Hip/Thigh  Right Knee  Left Knee  Right leg  Left leg  Right Ankle/Foot  Left Ankle/Foot |
| Duration of musculoskeletal /rheumatic manifestations (days) |  |
| The maximum musculoskeletal pain score |  |
| Have you experienced any other musculoskeletal or rheumatic manifestations at the onset or post COVID-19 infection |  |
